# Supplementary material
Source: PubMed Central journal article supplement (PMC9487512)
Supplement: aac.00849-22-s0001.pdf [file aac.00849-22-s0001.pdf]

| Section              | Endpoints (wavelength)<br>used to obtain the MIC | MICs (mg/L) |       |       |       |       |      |      |       |       | Agreement<br>(%) | Statistical wtUL at each %<br>of modelled population |       |       |       |       |
|----------------------|--------------------------------------------------|-------------|-------|-------|-------|-------|------|------|-------|-------|------------------|------------------------------------------------------|-------|-------|-------|-------|
|                      |                                                  | 0.001       | 0.002 | 0.004 | 0.008 | 0.016 | 0.03 | 0.06 | 0.125 | ≥0.25 |                  | 95%                                                  | 97.5% | 99%   | 99.5% | 99.9% |
| <b>Flavi (n=44)</b>  | Visual                                           | 0           | 0     | 1     | 18    | 25    | 0    | 0    | 0     | 0     | ND               | ND                                                   | ND    | ND    | ND    |       |
|                      | 90% (405nm)                                      | 0           | 0     | 1     | 34    | 9     | 0    | 0    | 0     | 0     | 100              | 0.016                                                | 0.016 | 0.016 | 0.016 | 0.016 |
|                      | 95% (405nm)                                      | 0           | 0     | 0     | 15    | 23    | 3    | 2    | 1     | 0     | 90.1             | 0.03                                                 | 0.03  | 0.03  | 0.03  | 0.03  |
|                      | 90% (450nm)                                      | 0           | 0     | 1     | 33    | 10    | 0    | 0    | 0     | 0     | 100              | 0.016                                                | 0.016 | 0.016 | 0.016 | 0.016 |
|                      | 95% (450nm)                                      | 0           | 0     | 0     | 13    | 24    | 3    | 0    | 4     | 1     | 86.4             | 0.03                                                 | 0.03  | 0.03  | 0.03  | 0.03  |
|                      | 90% (492nm)                                      | 0           | 0     | 1     | 37    | 6     | 0    | 0    | 0     | 0     | 100              | 0.016                                                | 0.016 | 0.016 | 0.016 | 0.016 |
|                      | 95% (492nm)                                      | 0           | 0     | 0     | 26    | 18    | 0    | 0    | 0     | 0     | 100              | 0.016                                                | 0.016 | 0.016 | 0.016 | 0.016 |
|                      | 90% (540nm)                                      | 0           | 0     | 1     | 38    | 5     | 0    | 0    | 0     | 0     | 100              | 0.016                                                | 0.016 | 0.016 | 0.016 | 0.016 |
|                      | 95% (540nm)                                      | 0           | 0     | 0     | 27    | 17    | 0    | 0    | 0     | 0     | 100              | 0.016                                                | 0.016 | 0.016 | 0.016 | 0.016 |
|                      | 90% (620nm)                                      | 0           | 0     | 1     | 37    | 6     | 0    | 0    | 0     | 0     | 100              | 0.016                                                | 0.016 | 0.016 | 0.016 | 0.016 |
| 95% (620nm)          | 0                                                | 0           | 0     | 30    | 14    | 0     | 0    | 0    | 0     | 100   | 0.016            | 0.016                                                | 0.016 | 0.016 | 0.016 |       |
| <b>Terrei (n=33)</b> | Visual                                           | 0           | 0     | 4     | 24    | 5     | 0    | 0    | 0     | 0     | ND               | 0.016                                                | 0.016 | 0.016 | 0.016 | 0.016 |
|                      | 90% (405nm)                                      | 0           | 0     | 16    | 16    | 1     | 0    | 0    | 0     | 0     | 100              | 0.008                                                | 0.008 | 0.008 | 0.008 | 0.008 |
|                      | 95% (405nm)                                      | 0           | 0     | 6     | 19    | 4     | 2    | 1    | 1     | 0     | 90.9             | 0.016                                                | 0.016 | 0.016 | 0.016 | 0.03  |
|                      | 90% (450nm)                                      | 0           | 0     | 15    | 15    | 3     | 0    | 0    | 0     | 0     | 100              | 0.008                                                | 0.008 | 0.008 | 0.008 | 0.008 |
|                      | 95% (450nm)                                      | 0           | 0     | 5     | 16    | 5     | 2    | 2    | 2     | 1     | 66.7             | 0.016                                                | 0.016 | 0.016 | 0.016 | 0.03  |
|                      | 90% (492nm)                                      | 0           | 0     | 17    | 15    | 1     | 0    | 0    | 0     | 0     | 100              | 0.008                                                | 0.008 | 0.008 | 0.008 | 0.008 |
|                      | 95% (492nm)                                      | 0           | 0     | 9     | 19    | 4     | 1    | 0    | 0     | 0     | 100              | 0.016                                                | 0.016 | 0.016 | 0.016 | 0.03  |
|                      | 90% (540nm)                                      | 0           | 0     | 18    | 14    | 1     | 0    | 0    | 0     | 0     | 100              | 0.008                                                | 0.008 | 0.008 | 0.008 | 0.008 |
|                      | 95% (540nm)                                      | 0           | 0     | 11    | 18    | 3     | 1    | 0    | 0     | 0     | 100              | 0.016                                                | 0.016 | 0.016 | 0.016 | 0.016 |
|                      | 90% (620nm)                                      | 0           | 0     | 19    | 13    | 1     | 0    | 0    | 0     | 0     | 100              | 0.008                                                | 0.008 | 0.008 | 0.008 | 0.008 |
| 95% (620nm)          | 0                                                | 0           | 11    | 19    | 2     | 1     | 0    | 0    | 0     | 100   | 0.016            | 0.016                                                | 0.016 | 0.016 | 0.016 |       |
| <b>Nigri (n=23)</b>  | Visual                                           | 0           | 0     | 0     | 0     | 9     | 12   | 2    | 0     | 0     | ND               | 0.06                                                 | 0.06  | 0.06  | 0.06  | 0.06  |
|                      | 90% (405nm)                                      | 0           | 0     | 0     | 0     | 9     | 6    | 6    | 1     | 1     | 86.9             | 0.03                                                 | 0.03  | 0.03  | 0.03  | 0.03  |
|                      | 95% (405nm)                                      | 0           | 0     | 0     | 0     | 1     | 2    | 7    | 6     | 7     | 30.4             | 0.25                                                 | 0.25  | 0.5   | 0.5   | 0.5   |
|                      | 90% (450nm)                                      | 0           | 0     | 0     | 0     | 8     | 6    | 3    | 4     | 2     | 73.9             | 0.03                                                 | 0.03  | 0.03  | 0.03  | 0.03  |
|                      | 95% (450nm)                                      | 0           | 0     | 0     | 0     | 1     | 2    | 3    | 8     | 9     | 26.1             | ND                                                   | ND    | ND    | ND    | ND    |
|                      | 90% (492nm)                                      | 0           | 0     | 0     | 0     | 8     | 11   | 4    | 0     | 0     | 100              | 0.06                                                 | 0.06  | 0.06  | 0.125 | 0.125 |
|                      | 95% (492nm)                                      | 0           | 0     | 0     | 0     | 2     | 8    | 6    | 4     | 3     | 60.8             | 0.125                                                | 0.125 | 0.25  | 0.25  | 0.5   |
|                      | 90% (540nm)                                      | 0           | 0     | 0     | 0     | 8     | 10   | 5    | 0     | 0     | 100              | 0.06                                                 | 0.06  | 0.125 | 0.125 | 0.125 |
|                      | 95% (540nm)                                      | 0           | 0     | 0     | 0     | 4     | 8    | 8    | 3     | 0     | 82.6             | 0.125                                                | 0.125 | 0.25  | 0.25  | 0.25  |
|                      | 90% (620nm)                                      | 0           | 0     | 0     | 0     | 9     | 13   | 1    | 0     | 0     | 100              | 0.03                                                 | 0.06  | 0.06  | 0.06  | 0.06  |
| 95% (620nm)          | 0                                                | 0           | 0     | 0     | 4     | 11    | 6    | 1    | 1     | 91.3  | 0.06             | 0.125                                                | 0.125 | 0.125 | 0.125 |       |

| Section      | Endpoints (wavelength) used to obtain the MIC | MICs (mg/L) |       |       |       |       |      |      |       |       | Agreement (%) | Statistical wtUL at each % of modelled population |       |     |       |       |
|--------------|-----------------------------------------------|-------------|-------|-------|-------|-------|------|------|-------|-------|---------------|---------------------------------------------------|-------|-----|-------|-------|
|              |                                               | 0.001       | 0.002 | 0.004 | 0.008 | 0.016 | 0.03 | 0.06 | 0.125 | ≥0.25 |               | 95%                                               | 97.5% | 99% | 99.5% | 99.9% |
|              |                                               |             |       |       |       |       |      |      |       |       |               |                                                   |       |     |       |       |
| Other (n=13) | Visual                                        | 1           | 1     | 0     | 1     | 8     | 2    | 0    | 0     | 0     | ND            | ND                                                | ND    | ND  | ND    |       |
|              | 90% (405nm)                                   | 0           | 2     | 0     | 4     | 5     | 2    | 0    | 0     | 0     | 100           | ND                                                | ND    | ND  | ND    |       |
|              | 95% (405nm)                                   | 0           | 1     | 0     | 2     | 4     | 5    | 0    | 1     | 0     | 84.6          | ND                                                | ND    | ND  | ND    |       |
|              | 90% (450nm)                                   | 0           | 2     | 0     | 3     | 6     | 2    | 0    | 0     | 0     | 100           | ND                                                | ND    | ND  | ND    |       |
|              | 95% (450nm)                                   | 0           | 0     | 1     | 1     | 5     | 3    | 1    | 1     | 1     | 69.2          | ND                                                | ND    | ND  | ND    |       |
|              | 90% (492nm)                                   | 0           | 2     | 0     | 4     | 6     | 1    | 0    | 0     | 0     | 100           | ND                                                | ND    | ND  | ND    |       |
|              | 95% (492nm)                                   | 0           | 2     | 0     | 2     | 5     | 4    | 0    | 0     | 0     | 100           | ND                                                | ND    | ND  | ND    |       |
|              | 90% (540nm)                                   | 1           | 1     | 0     | 5     | 5     | 1    | 0    | 0     | 0     | 100           | ND                                                | ND    | ND  | ND    |       |
|              | 95% (540nm)                                   | 0           | 2     | 0     | 2     | 6     | 3    | 0    | 0     | 0     | 100           | ND                                                | ND    | ND  | ND    |       |
|              | 90% (620nm)                                   | 0           | 2     | 0     | 5     | 5     | 1    | 0    | 0     | 0     | 100           | ND                                                | ND    | ND  | ND    |       |
|              | 95% (620nm)                                   | 0           | 2     | 0     | 2     | 6     | 3    | 0    | 0     | 0     | 92.3          | ND                                                | ND    | ND  | ND    |       |

| Section    | Endpoints (wavelength) used to obtain the MIC | MICs (mg/L) |       |       |       |       |      |      |       |          |          |   |   |          |          |     |
|------------|-----------------------------------------------|-------------|-------|-------|-------|-------|------|------|-------|----------|----------|---|---|----------|----------|-----|
|            |                                               | 0.001       | 0.002 | 0.004 | 0.008 | 0.016 | 0.03 | 0.06 | 0.125 | 0.25     | 0.5      | 1 | 2 | 4        | 8        | ≥16 |
|            |                                               |             |       |       |       |       |      |      |       |          |          |   |   |          |          |     |
| Usti (n=7) | Visual                                        | 0           | 0     | 0     | 0     | 0     | 0    | 0    | 0     | 1        | <b>6</b> | 0 | 0 | 0        | 0        | 0   |
|            | 90% (405nm)                                   | 0           | 0     | 0     | 0     | 0     | 0    | 0    | 0     | 1        | <b>5</b> | 0 | 0 | 0        | 0        | 0   |
|            | 95% (405nm)                                   | 0           | 0     | 0     | 0     | 0     | 0    | 0    | 0     | 1        | 0        | 1 | 0 | <b>2</b> | <b>3</b> | 0   |
|            | 90% (450nm)                                   | 0           | 0     | 0     | 0     | 0     | 0    | 0    | 1     | 0        | <b>4</b> | 2 | 0 | 0        | 0        | 0   |
|            | 95% (450nm)                                   | 0           | 0     | 0     | 0     | 0     | 0    | 0    | 0     | 1        | 0        | 1 | 0 | <b>2</b> | <b>3</b> | 0   |
|            | 90% (492nm)                                   | 0           | 0     | 0     | 0     | 0     | 0    | 0    | 1     | 1        | <b>5</b> | 0 | 0 | 0        | 0        | 0   |
|            | 95% (492nm)                                   | 0           | 0     | 0     | 0     | 0     | 0    | 0    | 0     | 1        | <b>4</b> | 2 | 0 | 0        | 0        | 0   |
|            | 90% (540nm)                                   | 0           | 0     | 0     | 0     | 0     | 0    | 0    | 1     | <b>4</b> | 2        | 0 | 0 | 0        | 0        | 0   |
|            | 95% (540nm)                                   | 0           | 0     | 0     | 0     | 0     | 0    | 0    | 1     | <b>5</b> | 1        | 0 | 0 | 0        | 0        | 0   |
|            | 90% (620nm)                                   | 0           | 0     | 0     | 0     | 0     | 0    | 0    | 1     | <b>4</b> | 2        | 0 | 0 | 0        | 0        | 0   |
|            | 95% (620nm)                                   | 0           | 0     | 0     | 0     | 0     | 0    | 0    | 1     | <b>5</b> | 1        | 0 | 0 | 0        | 0        | 0   |

ND, not done

Numbers in bold indicate modal MIC

|                       | Endpoints (wavelength)<br>used to obtain the MIC | MICs (mg/L) |       |       |           |           |           |      |       |        | Agreement<br>(%) |
|-----------------------|--------------------------------------------------|-------------|-------|-------|-----------|-----------|-----------|------|-------|--------|------------------|
|                       |                                                  | 0.001       | 0.002 | 0.004 | 0.008     | 0.016     | 0.03      | 0.06 | 0.125 | >0.125 |                  |
| ATCC<br>203404 (n=24) | Visual                                           | 0           | 0     | 0     | 0         | <b>22</b> | 2         | 0    | 0     | 0      | ND               |
|                       | 90% (405nm)                                      | 0           | 0     | 0     | <b>19</b> | 5         | 0         | 0    | 0     | 0      | 95.8             |
|                       | 95% (405nm)                                      | 0           | 0     | 0     | 1         | <b>20</b> | 3         | 0    | 0     | 0      | 100,00           |
|                       | 90% (450nm)                                      | 0           | 0     | 0     | <b>15</b> | 9         | 0         | 0    | 0     | 0      | 100,00           |
|                       | 95% (450nm)                                      | 0           | 0     | 0     | 1         | <b>17</b> | 3         | 3    | 0     | 0      | 87.5             |
|                       | 90% (492nm)                                      | 0           | 0     | 0     | <b>18</b> | 6         | 0         | 0    | 0     | 0      | 95.8             |
|                       | 95% (492nm)                                      | 0           | 0     | 0     | 2         | <b>22</b> | 0         | 0    | 0     | 0      | 100,00           |
|                       | 90% (540nm)                                      | 0           | 0     | 0     | <b>18</b> | 6         | 0         | 0    | 0     | 0      | 95.8             |
|                       | 95% (540nm)                                      | 0           | 0     | 0     | 2         | <b>22</b> | 0         | 0    | 0     | 0      | 100,00           |
|                       | 90% (620nm)                                      | 0           | 0     | 0     | <b>17</b> | 7         | 0         | 0    | 0     | 0      | 95.8             |
|                       | 95% (620nm)                                      | 0           | 0     | 0     | 3         | 21        | 0         | 0    | 0     | 0      | 100,00           |
| ATCC<br>204305 (n=24) | Visual                                           | 0           | 0     | 0     | 2         | <b>19</b> | 3         | 0    | 0     | 0      | ND               |
|                       | 90% (405nm)                                      | 0           | 0     | 0     | 2         | <b>21</b> | 0         | 1    | 0     | 0      | 100              |
|                       | 95% (405nm)                                      | 0           | 0     | 0     | 0         | <b>10</b> | 9         | 2    | 2     | 1      | 79.2             |
|                       | 90% (450nm)                                      | 0           | 0     | 0     | 2         | <b>21</b> | 0         | 0    | 1     | 0      | 95.8             |
|                       | 95% (450nm)                                      | 0           | 0     | 0     | 0         | 8         | <b>10</b> | 2    | 3     | 1      | 75               |
|                       | 90% (492nm)                                      | 0           | 0     | 0     | 5         | <b>19</b> | 0         | 0    | 0     | 0      | 100              |
|                       | 95% (492nm)                                      | 0           | 0     | 0     | 0         | <b>18</b> | 4         | 2    | 0     | 0      | 95.8             |
|                       | 90% (540nm)                                      | 0           | 0     | 0     | 8         | <b>16</b> | 0         | 0    | 0     | 0      | 100              |
|                       | 95% (540nm)                                      | 0           | 0     | 0     | 1         | <b>20</b> | 2         | 1    | 0     | 0      | 95.8             |
|                       | 90% (620nm)                                      | 0           | 0     | 0     | 6         | <b>18</b> | 0         | 0    | 0     | 0      | 100              |
|                       | 95% (620nm)                                      | 0           | 0     | 0     | 2         | <b>20</b> | 1         | 1    | 0     | 0      | 95.8             |

ND, not done

Numbers in bold indicate modal MIC
